# Supplementary material for: Effect of insulin insufficiency on ultrastructure and function in skeletal muscle
Source: PubMed Central journal article supplement — J Cachexia Sarcopenia Muscle. 2023 Dec 20;15(1):112–23. doi: 10.1002/jcsm.13380 (PMC10834341; doi:10.1002/jcsm.13380), 2023-12-20
Supplement: JCSM-15-112-s001.pdf [file JCSM-15-112-s001.pdf]

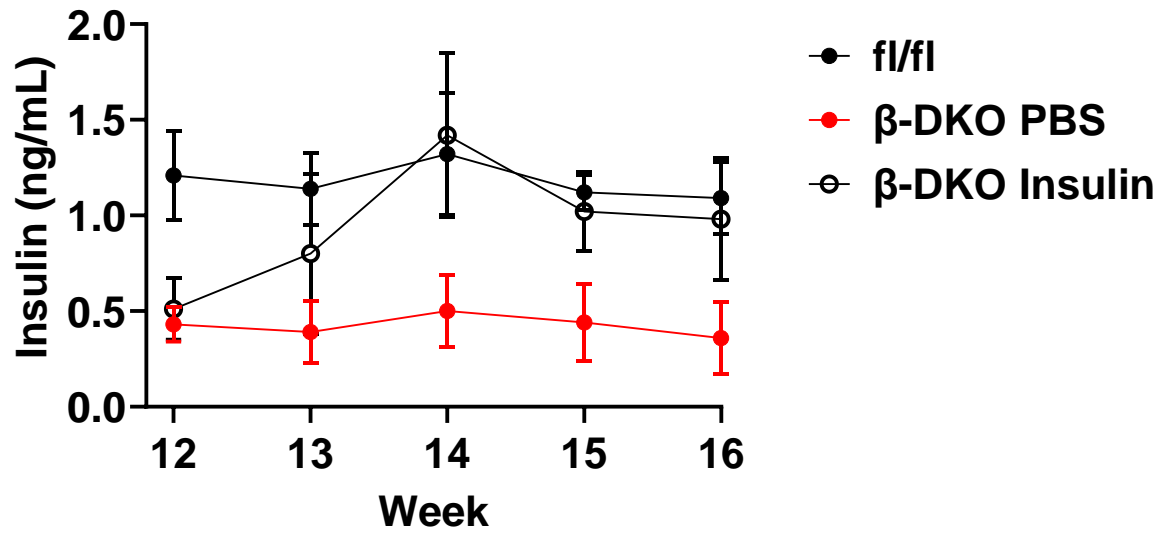

Supplementary Figure 1: Fed plasma insulin levels in control fl/fl mice and PBS- and insulin-supplemented  $\beta$ -DKO mice.

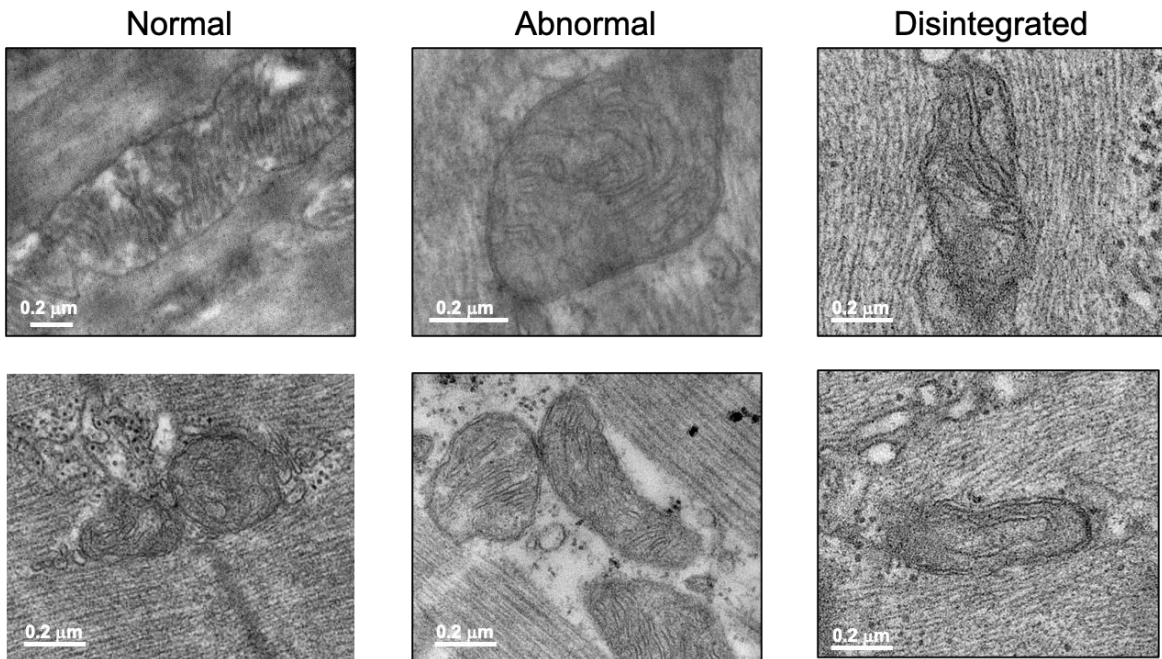

**Supplementary Figure 2: Examples of mitochondria categories used for quantitative analysis of mitochondrial quality in EDL muscle by TEM.**

**Supplementary Table 1: Transcripts differentially expressed in EDL muscle between control fl/fl mice and  $\beta$ -DKO mice.**

|                                                                          | <b>Fold change</b> | <b>False discovery rate</b> |
|--------------------------------------------------------------------------|--------------------|-----------------------------|
| <b>Expression increased in <math>\beta</math>-DKO vs fl/fl control</b>   |                    |                             |
| cadherin 4 Cdh4                                                          | 3.892833           | 1.97E-05                    |
| RPTOR independent companion of MTOR, complex 2 Rictor                    | 3.771738           | 1.63E-06                    |
| mab-21-like 1 (C. elegans) Mab21l1                                       | 3.333985           | 0.020934                    |
| potassium voltage-gated channel, subfamily G, member 4 Kcng4             | 2.663953           | 1.63E-06                    |
| upstream transcription factor family member 3 Usf3                       | 2.35029            | 2.64E-06                    |
| potassium voltage-gated channel, subfamily F, member 1 Kcnf1             | 2.348649           | 0.048006                    |
| S-adenosylmethionine decarboxylase 1 Amd1                                | 2.086871           | 0.079413                    |
| tectonin beta-propeller repeat containing 2 Tecpr2                       | 2.083586           | 0.002116                    |
| high mobility group AT-hook 2 Hmga2                                      | 1.902717           | 0.000487                    |
| serine/threonine kinase 11 Stk11                                         | 1.83706            | 0.041278                    |
| myosin, heavy polypeptide 4, skeletal muscle Myh4                        | 1.582213           | 8.36E-06                    |
| actinin alpha 3 Actn3                                                    | 1.539407           | 7.1E-05                     |
| tropomyosin 1, alpha Tpm1                                                | 1.507017           | 1.14E-05                    |
| creatine kinase, muscle Ckm                                              | 1.38831            | 0.000742                    |
| muscle glycogen phosphorylase Pygm                                       | 1.349962           | 0.074726                    |
| aldolase A, fructose-bisphosphate Aldoa                                  | 1.267484           | 0.058175                    |
| <b>Expression decreased in <math>\beta</math>-DKO vs fl/fl control</b>   |                    |                             |
| myosin, heavy polypeptide 1, skeletal muscle, adult Myh1                 | 1.559699           | 0.001992                    |
| glutathione synthetase Gss                                               | 1.762453           | 0.02551                     |
| creatine kinase, mitochondrial 2 Ckmt2                                   | 1.776419           | 0.048006                    |
| myosin binding protein C, slow-type Mybpc1                               | 1.927011           | 1.63E-06                    |
| actinin alpha 2 Actn2                                                    | 2.042271           | 0.006034                    |
| protein tyrosine phosphatase, receptor type, Q Ptprq                     | 2.124977           | 0.074726                    |
| myoglobin Mb                                                             | 2.171065           | 0.006388                    |
| EPS8-like 2 Eps8l2                                                       | 2.766763           | 0.068619                    |
| E74-like factor 1 Elf1                                                   | 2.816357           | 0.094722                    |
| myosin, heavy polypeptide 2, skeletal muscle, adult Myh2                 | 2.851151           | 5.18E-06                    |
| spectrin repeat containing, nuclear envelope 1 Syne1                     | 3.512969           | 0.068619                    |
| predicted gene 11127 Gm11127                                             | 3.762789           | 0.000473                    |
| leukocyte receptor cluster (LRC) member 8 Leng8                          | 4.360866           | 0.068619                    |
| lactate dehydrogenase B Ldhb                                             | 4.362688           | 0.053787                    |
| ankyrin repeat and zinc finger domain containing 1 Ankzf1                | 5.299245           | 0.000905                    |
| Ras association (RalGDS/AF-6) domain family (N-terminal) member 8 Rassf8 | 5.336577           | 0.074726                    |

**Supplementary Table 2: Transcripts differentially expressed in soleus muscle between control fl/fl mice and  $\beta$ -DKO mice.**

|                                                                                            | <b>Fold change</b> | <b>False discovery rate</b> |
|--------------------------------------------------------------------------------------------|--------------------|-----------------------------|
| <b>Expression increased in <math>\beta</math>-DKO vs fl/fl control</b>                     |                    |                             |
| metallothionein 2 Mt2                                                                      | 315.887858         | 0.00014109                  |
| predicted gene 45799 Timm10b                                                               | 303.402064         | 1.8111E-05                  |
| tissue inhibitor of metalloproteinase 1 Timp1                                              | 281.767758         | 2.6728E-05                  |
| nuclear receptor subfamily 4, group A, member 3 Nr4a3                                      | 244.241966         | 5.5621E-13                  |
| collagen, type VIII, alpha 2 Col8a2                                                        | 195.402066         | 1.013E-06                   |
| fibromodulin Fmod                                                                          | 186.041089         | 5.054E-08                   |
| tenascin C Tnc                                                                             | 156.304396         | 1.2894E-09                  |
| collagen, type XI, alpha 1 Col11a1                                                         | 112.130395         | 7.4789E-07                  |
| angiopoietin-like 7 Angptl7                                                                | 105.005396         | 0.00031537                  |
| integrin alpha M Itgam                                                                     | 95.5273219         | 0.00012207                  |
| thrombospondin 1 Thbs1                                                                     | 87.7744799         | 0.00017669                  |
| chondroadherin Chad                                                                        | 64.5891843         | 6.8925E-05                  |
| collagen, type XII, alpha 1 Col12a1                                                        | 64.5152457         | 4.822E-07                   |
| pentraxin 4 Ptx4                                                                           | 58.0948417         | 2.155E-09                   |
| chemokine (C-C motif) ligand 6 Ccl6                                                        | 57.7502693         | 4.2002E-05                  |
| hedgehog interacting protein-like 1 Hhip1                                                  | 56.9293577         | 1.3043E-11                  |
| cellular communication network factor 2 Ccn2                                               | 51.1747797         | 7.6078E-07                  |
| erythroferrone Erfe                                                                        | 47.8343156         | 2.6255E-11                  |
| FBJ osteosarcoma oncogene Fos                                                              | 45.0717692         | 0.00688853                  |
| tenomodulin Tnmd                                                                           | 44.9298892         | 8.8498E-06                  |
| sodium channel, voltage-gated, type V, alpha Scn5a                                         | 35.7383512         | 0.00012335                  |
| zinc finger protein 697 Zfp697                                                             | 35.1236675         | 9.4497E-08                  |
| versican Vcan                                                                              | 34.5544107         | 2.155E-09                   |
| cartilage intermediate layer protein 2 Cilp2                                               | 33.7605039         | 0.02442613                  |
| cartilage oligomeric matrix protein Comp                                                   | 28.3777672         | 0.01256866                  |
| lymphatic vessel endothelial hyaluronan receptor 1 Lyve1                                   | 27.2160277         | 2.7314E-09                  |
| matrix metalloproteinase 19 Mmp19                                                          | 26.0262394         | 5.6856E-06                  |
| embigin Emb                                                                                | 25.2770684         | 3.8547E-06                  |
| proteoglycan 4 (megakaryocyte stimulating factor, articular superficial zone protein) Prg4 | 24.84306           | 0.00013438                  |
| runt related transcription factor 1 Runx1                                                  | 23.5937908         | 9.8254E-08                  |
| mitogen-activated protein kinase kinase kinase 6 Map3k6                                    | 22.7629257         | 2.0134E-13                  |
| serine (or cysteine) peptidase inhibitor, clade A, member 3N Serpina3n                     | 22.0876518         | 4.822E-07                   |
| CD68 antigen Cd68                                                                          | 22.0040844         | 0.00510463                  |
| early growth response 1 Egr1                                                               | 21.4435819         | 0.00873695                  |
| coagulation factor II (thrombin) receptor-like 1 F2r1                                      | 20.9021068         | 0.00075681                  |
| thrombospondin 4 Thbs4                                                                     | 20.3645731         | 1.1223E-05                  |

|                                                                                                       |            |            |
|-------------------------------------------------------------------------------------------------------|------------|------------|
| cartilage intermediate layer protein, nucleotide pyrophosphohydrolase Cilp                            | 20.2733309 | 5.6165E-10 |
| integrin, beta-like 1 Itgbl1                                                                          | 20.267565  | 0.00039092 |
| fibronectin 1 Fn1                                                                                     | 20.262844  | 2.1655E-05 |
| salt inducible kinase 1 Sik1                                                                          | 19.9031347 | 0.00013438 |
| latent transforming growth factor beta binding protein 2 Ltbp2                                        | 18.7408172 | 2.5832E-08 |
| insulin receptor substrate 2 Irs2                                                                     | 18.4489986 | 0.0431585  |
| glutamine fructose-6-phosphate transaminase 2 Gfpt2                                                   | 18.2581954 | 0.00027226 |
| peroxisome proliferative activated receptor, gamma, coactivator 1 alpha Ppargc1a                      | 17.9666502 | 2.0132E-05 |
| CCAAT/enhancer binding protein (C/EBP), delta Cebpd                                                   | 17.8678223 | 0.00337059 |
| collagen, type I, alpha 2 Col1a2                                                                      | 17.7717894 | 0.00100731 |
| adhesion G protein-coupled receptor D1 Adgrd1                                                         | 17.6359685 | 5.2755E-05 |
| epithelial membrane protein 1 Emp1                                                                    | 17.2024533 | 0.00012572 |
| integrin beta 2 Itgb2                                                                                 | 17.0479969 | 0.00425523 |
| cation channel, sperm associated 4 Catsper4                                                           | 16.9025847 | 1.4063E-07 |
| zinc finger protein 469 Zfp469                                                                        | 16.5022511 | 3.4609E-05 |
| folliculin interacting protein 2 Fnip2                                                                | 15.1485024 | 0.00019605 |
| protein phosphatase 1, regulatory subunit 10 Ppp1r10                                                  | 14.8919847 | 5.5621E-13 |
| fibrinogen-like protein 2 Fgl2                                                                        | 14.8377892 | 0.00361599 |
| N-myc downstream regulated gene 4 Ndrg4                                                               | 13.7856373 | 0.00037263 |
| CD44 antigen Cd44                                                                                     | 13.6675049 | 0.00077693 |
| C-type lectin domain family 11, member a Clec11a                                                      | 13.6543471 | 0.00230666 |
| dihydropyrimidinase-like 3 Dpysl3                                                                     | 13.2537405 | 0.00651421 |
| a disintegrin-like and metallopeptidase (reprolysin type) with thrombospondin type 1 motif, 9 Adamts9 | 13.2042952 | 7.4983E-06 |
| periostin, osteoblast specific factor Postn                                                           | 13.0331531 | 5.7526E-06 |
| solute carrier family 15 (H+/peptide transporter), member 2 Slc15a2                                   | 12.9428167 | 0.00178861 |
| collagen, type I, alpha 1 Col1a1                                                                      | 12.9026108 | 0.00267751 |
| metallothionein 1 Mt1                                                                                 | 12.7005705 | 0.01083837 |
| lysyl oxidase-like 2 Loxl2                                                                            | 12.4237081 | 0.00344522 |
| prostaglandin I2 (prostacyclin) synthase -                                                            | 12.0811996 | 0.00072563 |
| RAB30, member RAS oncogene family Rab30                                                               | 12.0121819 | 0.01248442 |
| Rho GTPase activating protein 30 Arhgap30                                                             | 11.9758937 | 0.00084773 |
| adhesion G protein-coupled receptor E1 Adgre1                                                         | 11.9512669 | 0.00055322 |
| Iqj and Schip1 fusion protein Iqschfp                                                                 | 11.8948686 | 0.00044205 |
| predicted gene, 49804 -                                                                               | 11.7480552 | 0.00204405 |
| lysosomal-associated protein transmembrane 5 Laptm5                                                   | 11.6359713 | 1.5222E-05 |
| coagulation factor XIII, A1 subunit F13a1                                                             | 11.2919924 | 2.6657E-05 |
| adenylate cyclase 7 Adcy7                                                                             | 11.2915835 | 8.93E-06   |
| HECT, C2 and WW domain containing E3 ubiquitin protein ligase 2 Hecw2                                 | 11.1516857 | 0.00221707 |
| v-maf musculoaponeurotic fibrosarcoma oncogene family, protein F (avian) Maff                         | 11.0823997 | 0.00065029 |
| ectodermal-neural cortex 1 Enc1                                                                       | 11.0569355 | 0.00120168 |
| lysophosphatidic acid receptor 1 Lpar1                                                                | 10.9459954 | 0.00039616 |
| serine (or cysteine) peptidase inhibitor, clade B, member 8 Serpib8                                   | 10.8024305 | 1.1223E-05 |

|                                                                            |            |            |
|----------------------------------------------------------------------------|------------|------------|
| cathepsin S Ctss                                                           | 10.7273549 | 0.00524671 |
| fibronectin type III domain containing 1 Fndc1                             | 10.6129895 | 2.6955E-05 |
| proline arginine-rich end leucine-rich repeat Prelp                        | 10.6054774 | 0.00274157 |
| secreted phosphoprotein 1 Spp1                                             | 10.5271111 | 0.0002661  |
| lysyl oxidase Lox                                                          | 10.4327288 | 0.00618155 |
| Ras-related associated with diabetes Rrad                                  | 10.218397  | 0.02559645 |
| OTU domain containing 1 Otud1                                              | 10.1063917 | 0.00045752 |
| solute carrier family 38, member 2 Slc38a2                                 | 10.0500152 | 0.00213847 |
| period circadian clock 2 Per2                                              | 9.65615931 | 0.00817409 |
| interferon activated gene 205 Ifi205                                       | 9.64754521 | 0.00024503 |
| lectin, galactose binding, soluble 3 Lgals3                                | 9.28103767 | 0.00274157 |
| fibulin 1 Fbln1                                                            | 9.23244477 | 0.02012522 |
| NUAK family, SNF1-like kinase, 2 Nuak2                                     | 9.20759265 | 0.00222847 |
| cyclin D1 Ccnd1                                                            | 9.17645131 | 0.02798475 |
| sortilin-related VPS10 domain containing receptor 2 Sorcs2                 | 9.10927714 | 0.00834923 |
| WEE 1 homolog 1 (S. pombe) Wee1                                            | 9.08699837 | 0.00065029 |
| peptidase domain containing associated with muscle regeneration 1 Pamr1    | 9.00126956 | 0.01345282 |
| guanine nucleotide binding protein, alpha stimulating, olfactory type Gnal | 8.93123087 | 0.00014109 |
| N-acetyltransferase domain containing 1 Natd1                              | 8.760899   | 0.00010963 |
| colony stimulating factor 1 receptor Csf1r                                 | 8.76029693 | 0.00284005 |
| scavenger receptor cysteine rich family, 5 domains Ssc5d                   | 8.72194282 | 0.0257702  |
| lysyl oxidase-like 3 Loxl3                                                 | 8.5914209  | 0.00055322 |
| nuclear receptor subfamily 4, group A, member 1 Nr4a1                      | 8.51090577 | 0.00027591 |
| drebrin 1 Dbn1                                                             | 8.45805515 | 0.00066092 |
| mal, T cell differentiation protein-like Mall                              | 8.44506523 | 0.00200937 |
| elastin microfibril interfacier 2 Emilin2                                  | 8.41190081 | 0.00030487 |
| myelocytomatosis oncogene Myc                                              | 8.40416371 | 0.01651234 |
| SRY (sex determining region Y)-box 9 Sox9                                  | 8.40348936 | 0.04473441 |
| mannose receptor, C type 2 Mrc2                                            | 8.33397958 | 0.00158168 |
| reelin Reln                                                                | 8.3091645  | 0.00891459 |
| naked cuticle 2 Nkd2                                                       | 8.26469802 | 0.00102932 |
| G protein-coupled receptor 153 Gpr153                                      | 8.20302939 | 0.00348355 |
| zinc finger protein 185 Zfp185                                             | 8.18927737 | 0.0002661  |
| collagen, type XIV, alpha 1 Col14a1                                        | 8.1175145  | 0.00139387 |
| Fc receptor, IgG, low affinity III Fcgr3                                   | 7.81441262 | 0.00912103 |
| mesenteric estrogen dependent adipogenesis Medag                           | 7.77438536 | 8.009E-05  |
| collagen, type XVI, alpha 1 Col16a1                                        | 7.76486037 | 0.01502998 |
| zinc finger and BTB domain containing 16 Zbtb16                            | 7.67545137 | 4.3981E-05 |
| tubulin, beta 6 class V Tubb6                                              | 7.64289183 | 0.00344522 |
| pyridoxal (pyridoxine, vitamin B6) kinase Pdxk                             | 7.59887828 | 0.00995548 |
| LPS-induced TN factor Litaf                                                | 7.59058792 | 0.00657922 |
| carboxypeptidase X 2 (M14 family) Cpxm2                                    | 7.54651399 | 0.00884467 |
| keratin 80 Krt80                                                           | 7.54373805 | 0.00149876 |
| macrophage galactose N-acetyl-galactosamine specific lectin 2 Mgl2         | 7.53519209 | 0.01985801 |

|                                                                                      |            |            |
|--------------------------------------------------------------------------------------|------------|------------|
| feline leukemia virus subgroup C cellular receptor 1 Flvcr1                          | 7.5301775  | 0.02199621 |
| podoplanin Pdpn                                                                      | 7.48006556 | 0.00183658 |
| sushi, von Willebrand factor type A, EGF and pentraxin domain containing 1 Svep1     | 7.47219164 | 0.00550052 |
| phosphodiesterase 10A Pde10a                                                         | 7.3361616  | 0.00018081 |
| CCAAT/enhancer binding protein (C/EBP), beta Cebpb                                   | 7.21129504 | 0.00274157 |
| procollagen lysine, 2-oxoglutarate 5-dioxygenase 2 Plod2                             | 7.07009335 | 0.0014675  |
| matrix metalloproteinase 2 Mmp2                                                      | 7.06573722 | 0.0037345  |
| advillin Avil                                                                        | 7.05866928 | 1.6508E-05 |
| platelet factor 4 Pf4                                                                | 7.02928514 | 0.03585484 |
| protocadherin 7 Pcdh7                                                                | 6.91046647 | 0.00074448 |
| phosphoinositide-3-kinase regulatory subunit 5 Pik3r5                                | 6.90491314 | 0.00607362 |
| mitogen-activated protein kinase 4 Mapk4                                             | 6.81230376 | 0.01201429 |
| AE binding protein 1 Aebp1                                                           | 6.79609015 | 0.00039659 |
| epidermal growth factor receptor Egfr                                                | 6.76756021 | 0.00393043 |
| mannoside acetylglucosaminyltransferase 4, isoenzyme A Mgat4a                        | 6.74957771 | 0.00066955 |
| Ras and Rab interactor 3 Rin3                                                        | 6.72265403 | 0.00326217 |
| dermatan sulfate epimerase Dse                                                       | 6.70193524 | 0.00271757 |
| LRRN4 C-terminal like Lrrn4cl                                                        | 6.68675287 | 0.01434866 |
| discoidin domain receptor family, member 2 Ddr2                                      | 6.52784821 | 0.02069978 |
| solute carrier family 20, member 1 Slc20a1                                           | 6.48819816 | 0.00031537 |
| collagen, type XXVII, alpha 1 Col27a1                                                | 6.48620469 | 0.00166425 |
| follistatin-like 1 Fstl1                                                             | 6.46539975 | 0.00434387 |
| mesenchyme homeobox 1 Meox1                                                          | 6.45591563 | 0.00202072 |
| fibrillin 1 Fbn1                                                                     | 6.42163214 | 4.4461E-05 |
| integrin alpha 11 Itga11                                                             | 6.41694295 | 0.00274157 |
| Ras association and DIL domains Radil                                                | 6.41093768 | 0.00102932 |
| plexin A2 Plxna2                                                                     | 6.37656903 | 0.01014739 |
| proacrosin binding protein Acrbp                                                     | 6.35586507 | 0.00107002 |
| ATPase, class V, type 10A Atp10a                                                     | 6.16706082 | 0.006084   |
| stearoyl-Coenzyme A desaturase 1 Scd1                                                | 6.14968502 | 0.01532011 |
| calcium channel, voltage-dependent, beta subunit associated regulatory protein Cbarp | 6.13632974 | 0.01345282 |
| serine (or cysteine) peptidase inhibitor, clade F, member 1 Serpinf1                 | 6.04494677 | 0.02234566 |
| regulatory factor X, 2 (influences HLA class II expression) Rfx2                     | 6.02231851 | 0.04582482 |
| DENN/MADD domain containing 2A Dennd2a                                               | 5.990666   | 0.00084706 |
| predicted gene 11756 Gm11756                                                         | 5.93200883 | 0.00805211 |
| growth arrest specific 1 Gas1                                                        | 5.93058597 | 0.00753885 |
| elongation factor RNA polymerase II Eif                                              | 5.91322391 | 0.00438061 |
| interleukin 17D Il17d                                                                | 5.91250418 | 0.02559645 |
| plexin A4 Plxna4                                                                     | 5.87885105 | 1.2001E-05 |
| v-maf musculoaponeurotic fibrosarcoma oncogene family, protein K (avian) Mafk        | 5.86462621 | 0.02026195 |
| collagen, type VI, alpha 2 Col6a2                                                    | 5.85196462 | 0.00291368 |
| low density lipoprotein receptor-related protein 1 Lrp1                              | 5.84744648 | 0.00075191 |
| tumor necrosis factor receptor superfamily, member 25 Tnfrsf25                       | 5.82106598 | 0.02934215 |

|                                                                                              |            |            |
|----------------------------------------------------------------------------------------------|------------|------------|
| <b>scleraxis Scx</b>                                                                         | 5.79195978 | 0.00034609 |
| <b>complement component factor h Cfh</b>                                                     | 5.77817173 | 0.02529444 |
| <b>TBC1 domain family, member 9 Tbc1d9</b>                                                   | 5.75724638 | 0.01224856 |
| <b>myeloid-associated differentiation marker Myadm</b>                                       | 5.74757747 | 0.01393496 |
| <b>cysteine-serine-rich nuclear protein 1 Csrnp1</b>                                         | 5.71080554 | 0.00689744 |
| <b>ENSMUSG00000121578</b>                                                                    | 5.70323026 | 0.01155858 |
| <b>stromal cell-derived factor 2-like 1 Sdf2l1</b>                                           | 5.64213861 | 0.01372805 |
| <b>Kruppel-like factor 3 (basic) Klf3</b>                                                    | 5.63196996 | 0.00510463 |
| <b>proprotein convertase subtilisin/kexin type 5 Pcsk5</b>                                   | 5.62031347 | 0.00232909 |
| <b>E74-like factor 4 (ets domain transcription factor) Elf4</b>                              | 5.57009864 | 0.00425721 |
| <b>tenascin XB Tnxb</b>                                                                      | 5.55854386 | 0.00011146 |
| <b>regulator of calcineurin 1 Rcan1</b>                                                      | 5.53858966 | 4.1168E-05 |
| <b>AXL receptor tyrosine kinase Axl</b>                                                      | 5.53691521 | 0.00682128 |
| <b>H1.9 linker histone H1f9</b>                                                              | 5.52571745 | 0.00773557 |
| <b>thrombospondin 3 Thbs3</b>                                                                | 5.50847072 | 0.00077693 |
| <b>carboxylesterase 5A Ces5a</b>                                                             | 5.4748406  | 0.00750199 |
| <b>CD109 antigen Cd109</b>                                                                   | 5.43003574 | 0.00230666 |
| <b>Rho GTPase activating protein 26 Arhgap26</b>                                             | 5.41330348 | 0.02245268 |
| <b>matrix Gla protein Mgp</b>                                                                | 5.39936149 | 0.02225316 |
| <b>cerebellar degeneration-related 2 Cdr2</b>                                                | 5.39077385 | 0.00193926 |
| <b>tubulin, beta 2B class IIB Tubb2b</b>                                                     | 5.33587057 | 0.00533211 |
| <b>slit guidance ligand 3 Slit3</b>                                                          | 5.31656619 | 0.00346577 |
| <b>collagen, type V, alpha 2 Col5a2</b>                                                      | 5.27074042 | 0.00626291 |
| <b>pre B cell leukemia homeobox 3 Pbx3</b>                                                   | 5.25387109 | 0.01393496 |
| <b>complement component 1, q subcomponent, C chain C1qc</b>                                  | 5.25333539 | 0.02483316 |
| <b>strawberry notch 2 Sbno2</b>                                                              | 5.24913287 | 0.00258716 |
| <b>nuclear factor, interleukin 3, regulated Nfil3</b>                                        | 5.20506727 | 0.01759268 |
| <b>sorbin and SH3 domain containing 3 Sorbs3</b>                                             | 5.20192731 | 0.00022721 |
| <b>unc-13 homolog D Unc13d</b>                                                               | 5.16992642 | 0.00434387 |
| <b>olfactomedin-like 2B Olfml2b</b>                                                          | 5.15691555 | 0.01393496 |
| <b>chloride intracellular channel 4 (mitochondrial) Clc4</b>                                 | 5.15489816 | 0.00072048 |
| <b>solute carrier family 7 (cationic amino acid transporter, y+ system), member 1 Slc7a1</b> | 5.12964325 | 0.00102932 |
| <b>von Willebrand factor A domain containing 1 Vwa1</b>                                      | 5.12267261 | 0.00906574 |
| <b>SH3 domain protein D19 Sh3d19</b>                                                         | 5.1183914  | 0.00425523 |
| <b>interferon activated gene 204 Ifi204</b>                                                  | 5.08152601 | 0.00556062 |
| <b>paralemmin A kinase anchor protein Pakap</b>                                              | 5.08088233 | 0.04110072 |
| <b>alkaline phosphatase, liver/bone/kidney Alpl</b>                                          | 5.03502833 | 0.00337059 |
| <b>a disintegrin and metalloproteinase domain 19 (meltrin beta) Adam19</b>                   | 5.02576571 | 0.0431585  |
| <b>toll-like receptor 4 Tlr4</b>                                                             | 5.01236395 | 0.00380425 |
| <b>UDP-Gal:betaGlcNAc beta 1,4-galactosyltransferase, polypeptide 6 B4galt6</b>              | 5.01164896 | 0.00274157 |
| <b>tumor necrosis factor receptor superfamily, member 12a Tnfrsf12a</b>                      | 4.9800393  | 0.01083044 |
| <b>tissue inhibitor of metalloproteinase 2 Timp2</b>                                         | 4.85259315 | 0.00907549 |
| <b>transgelin 2 Tagln2</b>                                                                   | 4.82472343 | 0.02934215 |



|                                                                                                       |            |            |
|-------------------------------------------------------------------------------------------------------|------------|------------|
| anthrax toxin receptor 1 Antxr1                                                                       | 4.80748239 | 0.01336038 |
| sushi-repeat-containing protein, X-linked 2 SrpX2                                                     | 4.80078628 | 0.03908268 |
| acetoacetyl-CoA synthetase Aacs                                                                       | 4.7839415  | 0.00310573 |
| coactosin-like 1 (Dictyostelium) Cot1                                                                 | 4.74828626 | 0.01807052 |
| vimentin Vim                                                                                          | 4.73968773 | 0.00254365 |
| vitrin Vit                                                                                            | 4.71461086 | 0.0388031  |
| tropomyosin 4 Tpm4                                                                                    | 4.71160534 | 0.02049759 |
| S100 calcium binding protein A10 (calpactin) S100a10                                                  | 4.70823788 | 0.00968023 |
| poliovirus receptor Pvr                                                                               | 4.70113839 | 0.01004436 |
| platelet-derived growth factor receptor-like Pdgfrl                                                   | 4.683342   | 0.00626291 |
| Fraser extracellular matrix complex subunit 1 Fras1                                                   | 4.6754029  | 0.00141916 |
| lecithin cholesterol acyltransferase Lcat                                                             | 4.62697522 | 0.03951736 |
| AHNAK nucleoprotein 2 Ahnak2                                                                          | 4.59316187 | 0.00750199 |
| ENSMUSG00000095041                                                                                    | 4.58785789 | 0.00525878 |
| CDP-diacylglycerol synthase 1 Cds1                                                                    | 4.58400127 | 0.04110072 |
| annexin A1 Anxa1                                                                                      | 4.57150044 | 0.00223869 |
| cysteine and glycine-rich protein 3 Csrp3                                                             | 4.55811356 | 0.0280054  |
| protein phosphatase 1, regulatory subunit 13 like Ppp1r13l                                            | 4.55148548 | 0.01079525 |
| biglycan Bgn                                                                                          | 4.52591981 | 0.01393496 |
| death associated protein kinase 1 Dapk1                                                               | 4.49901288 | 0.00750019 |
| laminin, gamma 2 Lamc2                                                                                | 4.48323987 | 0.00274157 |
| zinc finger and BTB domain containing 26 Zbtb26                                                       | 4.48093318 | 0.03756582 |
| transforming growth factor, beta induced Tgfb1                                                        | 4.47854087 | 0.01336038 |
| microtubule-associated protein 1B Map1b                                                               | 4.4709083  | 0.00393043 |
| integrin, alpha 10 Itga10                                                                             | 4.46649125 | 0.03982991 |
| Sec24 related gene family, member D (S. cerevisiae) Sec24d                                            | 4.42938814 | 0.01345282 |
| collagen, type VI, alpha 1 Col6a1                                                                     | 4.4147565  | 0.0099896  |
| collagen, type XVIII, alpha 1 Col18a1                                                                 | 4.39078253 | 0.01174358 |
| NLR family, CARD domain containing 5 Nlr5                                                             | 4.37491322 | 0.03588503 |
| epidermal growth factor-containing fibulin-like extracellular matrix protein 1 Efemp1                 | 4.35614105 | 0.00817409 |
| phosphodiesterase 5A, cGMP-specific Pde5a                                                             | 4.35052855 | 0.00890655 |
| WD repeat domain 81 Wdr81                                                                             | 4.34261868 | 0.03509434 |
| microtubule associated monooxygenase, calponin and LIM domain containing -like 1 Mical1               | 4.33564834 | 0.00036909 |
| ret proto-oncogene Ret                                                                                | 4.3256681  | 0.03990217 |
| receptor-interacting serine-threonine kinase 3 Ripk3                                                  | 4.31490109 | 0.03677365 |
| a disintegrin-like and metallopeptidase (reprolysin type) with thrombospondin type 1 motif, 8 Adamts8 | 4.28204334 | 0.02341984 |
| carboxylesterase 2C Ces2c                                                                             | 4.2809602  | 0.03002208 |
| Jun dimerization protein 2 Jdp2                                                                       | 4.26638065 | 0.01653921 |
| fibroblast growth factor receptor 3 Fgfr3                                                             | 4.26278108 | 0.00772354 |
| collagen, type VI, alpha 3 Col6a3                                                                     | 4.25156346 | 0.01735642 |
| ring finger protein 144B Rnf144b                                                                      | 4.25147582 | 0.01079525 |
| annexin A2 Anxa2                                                                                      | 4.23569249 | 0.00434387 |
| proprotein convertase subtilisin/kexin type 6 Pcsk6                                                   | 4.21986739 | 0.01133451 |
| microfibrillar associated protein 5 Mfap5                                                             | 4.21593664 | 0.00706405 |

|                                                                                     |            |            |
|-------------------------------------------------------------------------------------|------------|------------|
| endothelin receptor type B Ednrb                                                    | 4.20462609 | 0.0431585  |
| prostate transmembrane protein, androgen induced 1 Pmepa1                           | 4.19813485 | 0.02012522 |
| RNA binding motif protein 12 B1 Rbm12b1                                             | 4.1917968  | 0.02341984 |
| FYVE, RhoGEF and PH domain containing 3 Fgd3                                        | 4.19105663 | 0.00825343 |
| EYA transcriptional coactivator and phosphatase 1 Eya1                              | 4.1765802  | 0.0162846  |
| transferrin receptor Tfrc                                                           | 4.16271718 | 0.01014739 |
| chemokine-like receptor 1 Cmklr1                                                    | 4.15864414 | 0.01226934 |
| RIKEN cDNA 1110065P20 gene 1110065P20Rik                                            | 4.12216788 | 0.03158457 |
| RAB3A interacting protein (rabin3)-like 1 Rab3il1                                   | 4.10582684 | 0.02988793 |
| zinc finger SWIM-type containing 6 Zswim6                                           | 4.09863205 | 0.01130906 |
| ski sarcoma viral oncogene homolog (avian) Ski                                      | 4.09195668 | 0.02679512 |
| ADP-ribosylation factor-like 13B Arl13b                                             | 4.09171313 | 0.00753885 |
| collagen, type V, alpha 1 Col5a1                                                    | 4.06489257 | 0.0079776  |
| forkhead box O1 Foxo1                                                               | 4.0504303  | 0.0306347  |
| tumor necrosis factor receptor superfamily, member 23 Tnfrsf23                      | 4.03722408 | 0.04764597 |
| UDP-glucose dehydrogenase Ugdh                                                      | 4.0301866  | 0.00264925 |
| TOG array regulator of axonemal microtubules 2 Togaram2                             | 4.02596612 | 0.01224856 |
| collagen, type III, alpha 1 Col3a1                                                  | 4.01251179 | 0.01336038 |
| pleckstrin homology domain containing, family F (with FYVE domain) member 1 Plekhf1 | 4.00483924 | 0.03998977 |
| cellular communication network factor 3 Ccn3                                        | 3.99111868 | 0.03542224 |
| inter-alpha (globulin) inhibitor H5 Itih5                                           | 3.95945166 | 0.01248442 |
| transcriptional and immune response regulator Tcim                                  | 3.95046319 | 0.00689843 |
| tensin 3 Tns3                                                                       | 3.94656826 | 0.03310089 |
| calcium channel, voltage-dependent, T type, alpha 1G subunit Cacna1g                | 3.94483098 | 0.00682128 |
| expressed sequence C77080 C77080                                                    | 3.9437829  | 0.01079525 |
| signal-regulatory protein alpha Sirpa                                               | 3.92615826 | 0.03644731 |
| heat shock protein 1A Hspa1a                                                        | 3.90723182 | 0.00639162 |
| forkhead box K1 Foxk1                                                               | 3.88326081 | 0.01182355 |
| sperm associated antigen 5 Spag5                                                    | 3.87246051 | 0.0435929  |
| sulfatase 2 Sulf2                                                                   | 3.87036674 | 0.00441282 |
| histone deacetylase 4 Hdac4                                                         | 3.85937218 | 0.04062149 |
| Sec61 beta subunit Sec61b                                                           | 3.85499167 | 0.01652323 |
| glucosamine-6-phosphate deaminase 1 Gnpda1                                          | 3.85000202 | 0.00753885 |
| coiled-coil domain containing 50 Ccdc50                                             | 3.82823458 | 0.0079776  |
| RNA binding motif protein 12 B2 Rbm12b2                                             | 3.81735424 | 0.03665714 |
| cell adhesion molecule 3 Cadm3                                                      | 3.80023202 | 0.04794045 |
| filamin, alpha Flna                                                                 | 3.751354   | 0.01234048 |
| vascular endothelial growth factor A Vegfa                                          | 3.73947505 | 0.01719525 |
| family with sequence similarity 241, member A Fam241a                               | 3.73026615 | 0.01020465 |
| meningioma 1 Mn1                                                                    | 3.7277615  | 0.01393496 |
| tubulin, alpha 1A Tuba1a                                                            | 3.70429969 | 0.0420074  |
| RIKEN cDNA 2610028H24 gene 2610028H24Rik                                            | 3.68899641 | 0.03994594 |
| SMAD family member 7 Smad7                                                          | 3.66441526 | 0.04618995 |
| cytoskeleton-associated protein 4 Ckap4                                             | 3.63374454 | 0.00881584 |

|                                                                                                      |            |            |
|------------------------------------------------------------------------------------------------------|------------|------------|
| pleckstrin homology like domain, family A, member 1 Phlda1                                           | 3.63367727 | 0.04467012 |
| fibronectin type III domain containing 3B Fndc3b                                                     | 3.61351086 | 0.01906245 |
| frizzled class receptor 7 Fzd7                                                                       | 3.59894267 | 0.02046178 |
| procollagen-proline, 2-oxoglutarate 4-dioxygenase (proline 4-hydroxylase), alpha 1 polypeptide P4ha1 | 3.59691588 | 0.01435015 |
| DENN/MADD domain containing 4A Dennd4a                                                               | 3.58085196 | 0.01636425 |
| cysteine-rich with EGF-like domains 2 Creld2                                                         | 3.58035091 | 0.00770529 |
| WW domain binding protein 1 like Wbp11                                                               | 3.55513209 | 0.00533211 |
| low density lipoprotein receptor Ldlr                                                                | 3.54787694 | 0.04062149 |
| xin actin-binding repeat containing 1 Xirp1                                                          | 3.5392545  | 0.01083837 |
| myelin basic protein expression factor 2, repressor Myef2                                            | 3.53094085 | 0.03995983 |
| folliculin Flcn                                                                                      | 3.48247031 | 0.01210247 |
| myocilin Myoc                                                                                        | 3.45219983 | 0.01107458 |
| DENN/MADD domain containing 5B Dennd5b                                                               | 3.44874778 | 0.04029732 |
| ubiquitination factor E4B Ube4b                                                                      | 3.4112675  | 0.01336038 |
| ankyrin repeat domain 2 (stretch responsive muscle) Ankrd2                                           | 3.38367226 | 0.01312    |
| PWWP domain containing 2B Pwwp2b                                                                     | 3.38161163 | 0.02232246 |
| actin-binding LIM protein 1 Ablim1                                                                   | 3.36105424 | 0.00524217 |
| PCF11 cleavage and polyadenylation factor subunit Pcf11                                              | 3.35323871 | 0.02288639 |
| growth arrest-specific 2 like 1 Gas2l1                                                               | 3.33348816 | 0.01393496 |
| alanyl (membrane) aminopeptidase Anpep                                                               | 3.32499391 | 0.03937018 |
| ring finger protein 150 Rnf150                                                                       | 3.29262801 | 0.02199621 |
| paralemmin A kinase anchor protein Pakap                                                             | 3.26504545 | 0.03982991 |
| ATPase, class I, type 8B, member 2 Atp8b2                                                            | 3.26459174 | 0.01831478 |
| Ras association (RalGDS/AF-6) and pleckstrin homology domains 1 Raph1                                | 3.26324435 | 0.01188289 |
| sulfatase 1 Sulf1                                                                                    | 3.24460692 | 0.03908268 |
| cystinosis, nephropathic Ctns                                                                        | 3.22788074 | 0.04104955 |
| solute carrier family 22 (organic cation transporter), member 4 Slc22a4                              | 3.20973651 | 0.04144853 |
| dishevelled segment polarity protein 2 Dvl2                                                          | 3.19815221 | 0.02476066 |
| ER degradation enhancer, mannosidase alpha-like 1 Edem1                                              | 3.1872383  | 0.04305617 |
| cytokine receptor-like factor 1 Crlf1                                                                | 3.18292805 | 0.04259879 |
| solute carrier family 22, member 23 Slc22a23                                                         | 3.06904838 | 0.02289676 |
| tubulin, beta 5 class I Tubb5                                                                        | 3.05815577 | 0.03816213 |
| HECT domain E3 ubiquitin protein ligase 2 Hectd2                                                     | 3.05098326 | 0.03809017 |
| serine carboxypeptidase 1 Scpep1                                                                     | 3.03478636 | 0.0420074  |
| mesencephalic astrocyte-derived neurotrophic factor -                                                | 3.01255313 | 0.03858238 |
| RUN and SH3 domain containing 2 Rusc2                                                                | 2.96292475 | 0.02123101 |
| dual specificity phosphatase 1 Dusp1                                                                 | 2.95055223 | 0.01411056 |
| RIKEN cDNA 6430548M08 gene 6430548M08Rik                                                             | 2.94433773 | 0.03373278 |
| mannosidase 2, alpha B2 Man2b2                                                                       | 2.93409024 | 0.0484129  |
| <b>Expression decreased in <math>\beta</math>-DKO vs fl/fl control</b>                               |            |            |
| UDP-Gal:betaGlcNAc beta 1,3-galactosyltransferase, polypeptide 2 B3galt2                             | 11.4338965 | 2.7188E-06 |
| zinc finger protein 750 Zfp750                                                                       | 9.13970537 | 0.00012572 |
| aldehyde dehydrogenase 1 family, member L1 Aldh1l1                                                   | 8.41543806 | 0.00128174 |

|                                                                                          |            |            |
|------------------------------------------------------------------------------------------|------------|------------|
| leucine rich repeat containing 38 Lrrc38                                                 | 8.17258487 | 1.8005E-05 |
| MEF2 activating motif and SAP domain containing transcriptional regulator Mamstr         | 7.75273912 | 2.4859E-07 |
| glycine N-methyltransferase Gnmt                                                         | 7.51519006 | 0.00534687 |
| glutathione S-transferase, theta 2 Gstt2                                                 | 7.25014622 | 0.03736185 |
| perilipin 5 Plin5                                                                        | 6.15304681 | 0.00274157 |
| zinc finger protein 879 Zfp879                                                           | 6.13355465 | 0.00362567 |
| predicted gene 4841 Gm4841                                                               | 6.01736804 | 0.01680409 |
| polo like kinase 2 Plk2                                                                  | 5.78643543 | 0.00657922 |
| parathyroid hormone 1 receptor Pth1r                                                     | 5.6312026  | 0.00506048 |
| Cbp/p300-interacting transactivator, with Glu/Asp-rich carboxy-terminal domain, 4 Cited4 | 5.59094959 | 0.01287261 |
| ring finger protein 122 Rnf122                                                           | 5.32658923 | 0.01983834 |
| CECR2, histone acetyl-lysine reader Cecr2                                                | 5.22087551 | 0.03469879 |
| apolipoprotein L 10B Apol10b                                                             | 5.03866065 | 0.01812929 |
| G0/G1 switch gene 2 G0s2                                                                 | 5.03002457 | 0.02808871 |
| interferon-induced protein with tetratricopeptide repeats 3B Ifit3b                      | 5.00253492 | 0.01469158 |
| solute carrier family 40 (iron-regulated transporter), member 1 Slc40a1                  | 4.94374336 | 0.00614409 |
| WSC domain containing 1 Wscd1                                                            | 4.92391602 | 0.00425523 |
| RIKEN cDNA 6430571L13 gene 6430571L13Rik                                                 | 4.91955229 | 0.03038222 |
| Rho GTPase activating protein 18 Arhgap18                                                | 4.8287183  | 0.00131644 |
| 4-hydroxyphenylpyruvate dioxygenase-like Hpd1                                            | 4.82478487 | 0.00204405 |
| synuclein, alpha interacting protein (synphilin) Sncaip                                  | 4.73964006 | 0.0006381  |
| myosin regulatory light chain interacting protein Myliip                                 | 4.5218652  | 0.00066092 |
| radical S-adenosyl methionine domain containing 2 Rsad2                                  | 4.49226092 | 0.03042766 |
| tubulin, gamma 2 Tubg2                                                                   | 4.46478956 | 0.029444   |
| HAUS augmin-like complex, subunit 4 Haus4                                                | 4.43162011 | 0.01133451 |
| ectonucleotide pyrophosphatase/phosphodiesterase 3 Enpp3                                 | 4.4313483  | 0.00890655 |
| NIM1 serine/threonine protein kinase Nim1k                                               | 4.39256762 | 0.04029732 |
| acyl-CoA thioesterase 2 Acot2                                                            | 4.38582924 | 0.02864561 |
| NAD(P)H dehydrogenase, quinone 1 Nqo1                                                    | 4.38159969 | 0.01192778 |
| armadillo-like helical domain containing 4 Armh4                                         | 4.3404354  | 0.00437052 |
| DNA-damage-inducible transcript 4-like Ddit4l                                            | 4.31098581 | 0.03593761 |
| dihydrodiol dehydrogenase (dimeric) Dhdh                                                 | 4.28364601 | 0.00607362 |
| zinc finger protein 52 Zfp52                                                             | 4.25352579 | 0.03756582 |
| cortexin 3 Ctxn3                                                                         | 4.21324324 | 0.01652323 |
| indolethylamine N-methyltransferase Inmt                                                 | 4.20640946 | 0.0072803  |
| myogenic differentiation 1 Myod1                                                         | 4.20079844 | 0.01985801 |
| Cbp/p300-interacting transactivator, with Glu/Asp-rich carboxy-terminal domain, 2 Cited2 | 4.13755896 | 0.00232909 |
| adhesion molecule with Ig like domain 3 Amigo3                                           | 4.09394199 | 0.04104955 |
| dual specificity phosphatase 10 Dusp10                                                   | 4.00580129 | 0.00066092 |
| nuclear receptor subfamily 1, group D, member 1 Nr1d1                                    | 3.95636641 | 0.02012522 |
| thyroid hormone responsive Thrsp                                                         | 3.84782958 | 0.01079525 |
| carbonic anhydrase 14 Car14                                                              | 3.84019653 | 0.0044909  |
| 6-phosphofructo-2-kinase/fructose-2,6-biphosphatase 1 Pfkfb1                             | 3.76002189 | 0.0079776  |

|                                                                                               |            |            |
|-----------------------------------------------------------------------------------------------|------------|------------|
| <b>solute carrier family 26, member 6 Slc26a6</b>                                             | 3.75318929 | 0.00753885 |
| <b>kelch-like 33 Klh33</b>                                                                    | 3.72979227 | 0.00216916 |
| <b>secretin receptor Sctr</b>                                                                 | 3.72906345 | 0.02466707 |
| <b>MDS1 and EVI1 complex locus Mecom</b>                                                      | 3.64528803 | 0.03756582 |
| <b>carbonic anhydrase 4 Car4</b>                                                              | 3.61749523 | 0.03181727 |
| <b>nuclear receptor subfamily 1, group H, member 3 Nr1h3</b>                                  | 3.58793363 | 0.01335667 |
| <b>microsomal glutathione S-transferase 1 Mgst1</b>                                           | 3.58431569 | 0.00200937 |
| <b>plexin domain containing 1 Plxdc1</b>                                                      | 3.57848845 | 0.02704906 |
| <b>target of EGR1, member 1 (nuclear) Toe1</b>                                                | 3.55096244 | 0.03038222 |
| <b>fibroblast growth factor receptor 4 Fgfr4</b>                                              | 3.38389371 | 0.02507614 |
| <b>septin 4 Septin4</b>                                                                       | 3.36587627 | 0.00998991 |
| <b>transmembrane and coiled-coil domains 4 Tmco4</b>                                          | 3.3215674  | 0.01204016 |
| <b>signal transducer and activator of transcription 5A Stat5a</b>                             | 3.28305043 | 0.02320622 |
| <b>pyruvate dehydrogenase phosphatase catalytic subunit 1 Pdp1</b>                            | 3.21620341 | 0.01345282 |
| <b>phospholipase C, delta 4 Plcd4</b>                                                         | 3.19970345 | 0.02442613 |
| <b>glutathione S-transferase, mu 2 Gstm2</b>                                                  | 3.11890944 | 0.01723242 |
| <b>isocitrate dehydrogenase 1 (NADP+), soluble ldh1</b>                                       | 3.10151072 | 0.02392418 |
| <b>polyamine oxidase (exo-N4-amino) Paox</b>                                                  | 3.04228349 | 0.04501694 |
| <b>argininosuccinate lyase Asl</b>                                                            | 3.01638018 | 0.04314435 |
| <b>pleckstrin homology domain containing, family H (with MyTH4 domain) member 3 Plekhh3</b>   | 2.99715921 | 0.01572652 |
| <b>sema domain, transmembrane domain (TM), and cytoplasmic domain, (semaphorin) 6C Sema6c</b> | 2.96476672 | 0.03276821 |
| <b>ankyrin repeat domain 9 Ankrd9</b>                                                         | 2.89643711 | 0.03042766 |
| <b>potassium inwardly-rectifying channel, subfamily J, member 8 Kcnj8</b>                     | 2.81555144 | 0.03756582 |
| <b>kyphoscoliosis peptidase Ky</b>                                                            | 2.78095136 | 0.04446621 |
| <b>ral guanine nucleotide dissociation stimulator Ralgds</b>                                  | 2.73816817 | 0.04191859 |
| <b>CDC42 effector protein (Rho GTPase binding) 3 Cdc42ep3</b>                                 | 2.69824731 | 0.04218048 |
| <b>FAST kinase domains 1 Fastkd1</b>                                                          | 2.65244329 | 0.04144358 |
| <b>caseinolytic mitochondrial matrix peptidase chaperone subunit Clpx</b>                     | 2.64991331 | 0.02898906 |

**Supplementary Table 3: Transcripts differentially expressed in EDL muscle between  $\beta$ -DKO mice treated with PBS and insulin.**

|                                                                                         | Fold change | False discovery rate |
|-----------------------------------------------------------------------------------------|-------------|----------------------|
| <b>Expression increased in <math>\beta</math>-DKO Ins vs <math>\beta</math>-DKO PBS</b> |             |                      |
| <b>lactate dehydrogenase B Ldhb</b>                                                     | 4.353275    | 0.080173             |
| <b>microtubule-associated protein 1 A Map1a</b>                                         | 4.070883    | 0.055235             |
| <b>EPS8-like 2 Eps8l2</b>                                                               | 3.439704    | 0.003969             |
| <b>myoglobin Mb</b>                                                                     | 2.250541    | 0.000735             |
| <b>creatine kinase, mitochondrial 2 Ckmt2</b>                                           | 1.961628    | 0.011665             |
| <b>myosin binding protein C, slow-type Mybpc1</b>                                       | 1.599328    | 0.084026             |
| <b>myosin, heavy polypeptide 1, skeletal muscle, adult Myh1</b>                         | 1.594162    | 0.009398             |
| <b>mitochondrially encoded NADH dehydrogenase 2 ND2</b>                                 | 1.396794    | 0.017172             |
| <b>mitochondrially encoded cytochrome c oxidase III COX3</b>                            | 1.197349    | 0.09742              |
| <b>Expression decreased in <math>\beta</math>-DKO Ins vs <math>\beta</math>-DKO PBS</b> |             |                      |
| <b>aldolase A, fructose-bisphosphate Aldoa</b>                                          | 1.209698    | 0.09742              |
| <b>ryanodine receptor 1, skeletal muscle Ryr1</b>                                       | 1.287901    | 0.055235             |
| <b>myosin binding protein C, fast-type Mybpc2</b>                                       | 1.417734    | 0.008806             |
| <b>dual specificity phosphatase 1 Dusp1</b>                                             | 1.439174    | 0.080173             |
| <b>tropomyosin 1, alpha Tpm1</b>                                                        | 1.511536    | 9.97E-07             |
| <b>myosin, heavy polypeptide 4, skeletal muscle Myh4</b>                                | 1.697096    | 4.00E-21             |
| <b>frizzled class receptor 7 Fzd7</b>                                                   | 1.983316    | 0.000208             |
| <b>tectonin beta-propeller repeat containing 2 Tecpr2</b>                               | 2.165953    | 0.007169             |
| <b>potassium voltage-gated channel, subfamily G, member 4 Kcng4</b>                     | 2.625393    | 0.010772             |
| <b>potassium voltage-gated channel, subfamily F, member 1 Kcnf1</b>                     | 2.877588    | 0.015407             |
| <b>upstream transcription factor family member 3 Usf3</b>                               | 2.961892    | 5.16E-09             |
| <b>RPTOR independent companion of MTOR, complex 2 Rictor</b>                            | 3.522655    | 1.16E-05             |
| <b>cadherin 4 Cdh4</b>                                                                  | 4.737905    | 3.12E-05             |
| <b>Myosin regulatory light chain 12B -</b>                                              | 13.11259    | 0.056071             |
| <b>aldolase A, fructose-bisphosphate Aldoa</b>                                          | 1.209698    | 0.09742              |
| <b>ryanodine receptor 1, skeletal muscle Ryr1</b>                                       | 1.287901    | 0.055235             |
| <b>myosin binding protein C, fast-type Mybpc2</b>                                       | 1.417734    | 0.008806             |
| <b>dual specificity phosphatase 1 Dusp1</b>                                             | 1.439174    | 0.080173             |
| <b>tropomyosin 1, alpha Tpm1</b>                                                        | 1.511536    | 9.97E-07             |
| <b>myosin, heavy polypeptide 4, skeletal muscle Myh4</b>                                | 1.697096    | 4.00E-21             |
| <b>frizzled class receptor 7 Fzd7</b>                                                   | 1.983316    | 0.000208             |
| <b>tectonin beta-propeller repeat containing 2 Tecpr2</b>                               | 2.165953    | 0.007169             |
| <b>potassium voltage-gated channel, subfamily G, member 4 Kcng4</b>                     | 2.625393    | 0.010772             |
| <b>potassium voltage-gated channel, subfamily F, member 1 Kcnf1</b>                     | 2.877588    | 0.015407             |
| <b>upstream transcription factor family member 3 Usf3</b>                               | 2.961892    | 5.16E-09             |
| <b>RPTOR independent companion of MTOR, complex 2 Rictor</b>                            | 3.522655    | 1.16E-05             |
| <b>cadherin 4 Cdh4</b>                                                                  | 4.737905    | 3.12E-05             |



**Supplementary Table 4: Transcripts differentially expressed in soleus muscle between  $\beta$ -DKO mice treated with PBS and insulin.**

|                                                                                         | <b>Fold change</b> | <b>False discovery rate</b> |
|-----------------------------------------------------------------------------------------|--------------------|-----------------------------|
| <b>Expression increased in <math>\beta</math>-DKO Ins vs <math>\beta</math>-DKO PBS</b> |                    |                             |
| <b>B cell leukemia/lymphoma 3 Bcl3</b>                                                  | 0.08841787         | 0.02524168                  |
| <b>ankyrin repeat domain 1 (cardiac muscle)-</b>                                        | 0.09930934         | 0.00164911                  |
| <b>predicted gene 13889 Gm13889</b>                                                     | 0.11185993         | 2.6666E-10                  |
| <b>hemoglobin alpha, adult chain 1 Hba-a1</b>                                           | 0.12352729         | 0.02045674                  |
| <b>hemoglobin, beta adult t chain Hbb-bt</b>                                            | 0.17792673         | 0.03952168                  |
| <b>ankyrin repeat domain 35 Ankrd35</b>                                                 | 0.17805746         | 0.00783436                  |
| <b>leucine rich repeat containing 38 Lrrc38</b>                                         | 0.18410922         | 0.00013545                  |
| <b>CD68 antigen Cd68</b>                                                                | 0.18857368         | 0.03952168                  |
| <b>heat shock protein 1B Hspa1b</b>                                                     | 0.18861857         | 0.00036588                  |
| <b>potassium voltage-gated channel, subfamily G, member 2 Kcng2</b>                     | 0.23013122         | 0.04990613                  |
| <b>cytochrome P450, family 39, subfamily a, polypeptide 1 Cyp39a1</b>                   | 0.24787265         | 0.01905892                  |
| <b>phosphodiesterase 4B, cAMP specific Pde4b</b>                                        | 0.26250656         | 0.01421318                  |
| <b>heat shock protein 1 Hspb1</b>                                                       | 0.26311706         | 0.00732982                  |
| <b>H4 clustered histone 9 H4c9</b>                                                      | 0.2717768          | 0.01890276                  |
| <b>dual specificity phosphatase 10 Dusp10</b>                                           | 0.27977918         | 0.01619584                  |
| <b>predicted gene 3893 -</b>                                                            | 0.28164255         | 0.03952168                  |
| <b>heat shock protein 1A Hspa1a</b>                                                     | 0.31126719         | 0.00192608                  |
| <b>Expression increased in <math>\beta</math>-DKO Ins vs <math>\beta</math>-DKO PBS</b> |                    |                             |
| <b>phosphoenolpyruvate carboxykinase 1, cytosolic Pck1</b>                              | 27.9690394         | 0.03538523                  |
| <b>dachshund family transcription factor 1 Dach1</b>                                    | 14.9714951         | 1.7965E-11                  |
| <b>predicted gene 20547 -</b>                                                           | 8.9544479          | 0.00141646                  |
| <b>pentraxin 4 Ptx4</b>                                                                 | 8.48018996         | 2.8531E-06                  |
| <b>adenomatosis polyposis coli down-regulated 1 -</b>                                   | 8.32195377         | 0.00471186                  |
| <b>phosphodiesterase 3B, cGMP-inhibited Pde3b</b>                                       | 8.107231           | 0.00642456                  |
| <b>solute carrier family 4 (anion exchanger), member 4 Slc4a4</b>                       | 8.09514442         | 0.01391817                  |
| <b>NCK-associated protein 5 Nckap5</b>                                                  | 7.91214405         | 0.01378667                  |
| <b>ADAMTS-like 1 Adamts1</b>                                                            | 7.88757225         | 0.00642456                  |
| <b>HECT, C2 and WW domain containing E3 ubiquitin protein ligase 2 Hecw2</b>            | 6.66513645         | 0.00471186                  |
| <b>phospholipase C, beta 1 Plcb1</b>                                                    | 6.40426037         | 0.000363                    |
| <b>acyl-CoA thioesterase 1 Acot1</b>                                                    | 6.23687792         | 0.01064114                  |
| <b>family with sequence similarity 117, member B Fam117b</b>                            | 5.43000925         | 0.01504768                  |
| <b>flavin containing monooxygenase 2 Fmo2</b>                                           | 5.24272618         | 0.000363                    |
| <b>RIKEN cDNA 9930111J21 gene 1 9930111J21Rik1</b>                                      | 5.12557903         | 0.01382766                  |
| <b>fibronectin 1 Fn1</b>                                                                | 4.99108511         | 0.00037872                  |
| <b>butyrophilin-like 9 Btnl9</b>                                                        | 4.83043807         | 0.00642456                  |
| <b>C1q and tumor necrosis factor related protein 1 C1qtnf1</b>                          | 4.77202699         | 0.04353263                  |
| <b>reelin Reln</b>                                                                      | 4.74882176         | 0.00192608                  |
| <b>ajuba LIM protein Ajuba</b>                                                          | 4.46017912         | 0.00960412                  |



|                                                                                |            |            |
|--------------------------------------------------------------------------------|------------|------------|
| predicted gene, 26566 -                                                        | 4.424546   | 0.01582583 |
| myelin basic protein expression factor 2, repressor Myef2                      | 4.29026669 | 0.00642456 |
| DEPP1 autophagy regulator Depp1                                                | 4.18411514 | 0.00192608 |
| Kruppel-like factor 13 Klf13                                                   | 4.18039964 | 0.01150915 |
| guanine deaminase Gda                                                          | 4.14941667 | 0.00564087 |
| Rap guanine nucleotide exchange factor (GEF) 5 Rapgef5                         | 3.99789603 | 0.03043476 |
| ATPase, Ca++ transporting, plasma membrane 4 Atp2b4                            | 3.89576952 | 0.00471186 |
| guanylate binding protein 7 Gbp7                                               | 3.81208348 | 0.02371283 |
| angiominin-like 2 Amotl2                                                       | 3.72335557 | 0.00783436 |
| papilin, proteoglycan-like sulfated glycoprotein Papln                         | 3.62550159 | 0.00643268 |
| protein tyrosine phosphatase, receptor type, B Ptpnb                           | 3.61551009 | 0.00036588 |
| MAM domain containing 2 Mamdc2                                                 | 3.61063068 | 0.01796555 |
| cellular communication network factor 3 Ccn3                                   | 3.60055621 | 0.04016193 |
| ATP-binding cassette, sub-family B (MDR/TAP), member 1A Abcb1a                 | 3.593384   | 0.00164911 |
| bone morphogenetic protein 6 -                                                 | 3.55786969 | 0.017957   |
| junctional cadherin 5 associated Jcad                                          | 3.55134259 | 0.00037872 |
| slit guidance ligand 3 Slit3                                                   | 3.46589552 | 0.00643268 |
| tissue inhibitor of metalloproteinase 3 Timp3                                  | 3.44971659 | 0.01382766 |
| golgi associated kinase 1B Gask1b                                              | 3.44087829 | 0.00564087 |
| phosphatidylinositol-3,4,5-trisphosphate-dependent Rac exchange factor 2 Prex2 | 3.43321303 | 0.01796555 |
| LIF receptor alpha Lifr                                                        | 3.42774368 | 0.04353263 |
| forkhead box K1 Foxk1                                                          | 3.4257517  | 0.03952168 |
| shroom family member 4 Shroom4                                                 | 3.27099122 | 0.02606346 |
| ATP-binding cassette, sub-family A (ABC1), member 5 Abca5                      | 3.24054358 | 0.00564087 |
| mcf.2 transforming sequence-like Mcf2l                                         | 3.17635601 | 0.00642456 |
| folliculin interacting protein 2 Fnip2                                         | 3.17305993 | 0.03043476 |
| zinc finger and BTB domain containing 10 Zbtb10                                | 3.08119871 | 0.03952168 |
| adhesion G protein-coupled receptor F5 Adgrf5                                  | 3.05350087 | 0.03538523 |
| jagged 1 Jag1                                                                  | 3.02933175 | 0.03952168 |
| SMAD family member 7 Smad7                                                     | 3.00268082 | 0.03952168 |
| early B cell factor 1 Ebf1                                                     | 2.99380555 | 0.03952168 |
| integrin alpha 6 Itga6                                                         | 2.94607614 | 0.017957   |
| plexin A2 Plxna2                                                               | 2.93543586 | 0.0437692  |
| caveolae associated 2 Cavin2                                                   | 2.85356232 | 0.00732982 |
| Von Willebrand factor Vwf                                                      | 2.58427128 | 0.04105607 |
| proline rich 13 Prr13                                                          | 0.36175919 | 0.04505914 |
| rhomoid like 1 Rhbdl1                                                          | 0.32862046 | 0.00642456 |
| tenascin C Tnc                                                                 | 0.32746827 | 0.02732075 |

**Supplementary Table 5: Gene Ontology biological process results based on transcripts differentially expressed in EDL muscle between control fl/fl mice and  $\beta$ -DKO mice obtained from the Mouse Portal of the Rn6 Genome Database.**

| <b>biological process</b>                                                       | <b>p value</b> |
|---------------------------------------------------------------------------------|----------------|
| muscle contraction                                                              | 7.31E-12       |
| muscle system process                                                           | 3.20E-11       |
| voluntary skeletal muscle contraction                                           | 4.53E-09       |
| twitch skeletal muscle contraction                                              | 4.53E-09       |
| striated muscle contraction                                                     | 5.01E-08       |
| slow-twitch skeletal muscle fiber contraction                                   | 9.39E-08       |
| skeletal muscle contraction                                                     | 3.36E-07       |
| multicellular organismal movement                                               | 1.46E-06       |
| musculoskeletal movement                                                        | 1.46E-06       |
| transition between fast and slow fiber                                          | 2.77E-06       |
| regulation of the force of skeletal muscle contraction                          | 8.34E-06       |
| regulation of skeletal muscle contraction by chemo-mechanical energy conversion | 8.34E-06       |
| regulation of skeletal muscle adaptation                                        | 1.27E-05       |

**Supplementary Table 6: Gene Ontology biological process results based on transcripts differentially expressed in soleus muscle between control fl/fl mice and  $\beta$ -DKO mice obtained from the Mouse Portal of the Rattus Genome Database.**

| <b>biological process</b>                       | <b>p value</b> |
|-------------------------------------------------|----------------|
| tissue development                              | 4.21E-23       |
| anatomical structure development                | 1.39E-21       |
| multicellular organism development              | 1.14E-20       |
| extracellular matrix organization               | 1.82E-20       |
| developmental process                           | 1.85E-20       |
| external encapsulating structure organization   | 2.26E-20       |
| extracellular structure organization            | 2.26E-20       |
| system development                              | 2.31E-20       |
| animal organ development                        | 4.92E-19       |
| collagen fibril organization                    | 5.35E-18       |
| positive regulation of cellular process         | 5.00E-16       |
| positive regulation of biological process       | 5.26E-16       |
| anatomical structure morphogenesis              | 3.56E-15       |
| circulatory system development                  | 4.78E-15       |
| regulation of locomotion                        | 5.21E-15       |
| regulation of cell migration                    | 5.24E-15       |
| regulation of cell motility                     | 1.32E-14       |
| cell differentiation                            | 2.06E-14       |
| cellular developmental process                  | 2.82E-14       |
| regulation of multicellular organismal process  | 3.40E-14       |
| regulation of programmed cell death             | 1.18E-13       |
| negative regulation of cellular process         | 1.56E-13       |
| regulation of developmental process             | 2.43E-13       |
| cell adhesion                                   | 5.88E-13       |
| regulation of apoptotic process                 | 7.30E-13       |
| negative regulation of biological process       | 8.39E-13       |
| cellular response to chemical stimulus          | 8.51E-13       |
| regulation of cell differentiation              | 1.35E-12       |
| skeletal system development                     | 3.71E-12       |
| response to organic substance                   | 4.60E-12       |
| regulation of cell population proliferation     | 6.69E-12       |
| vasculature development                         | 2.03E-11       |
| tube development                                | 5.58E-11       |
| response to external stimulus                   | 8.56E-11       |
| blood vessel development                        | 8.59E-11       |
| supramolecular fiber organization               | 1.03E-10       |
| regulation of response to stimulus              | 1.29E-10       |
| regulation of cell adhesion                     | 1.40E-10       |
| cellular response to oxygen-containing compound | 2.33E-10       |
| cell development                                | 2.85E-10       |

|                                                          |          |
|----------------------------------------------------------|----------|
| biological regulation                                    | 3.26E-10 |
| regulation of cellular process                           | 7.32E-10 |
| response to chemical                                     | 7.38E-10 |
| tube morphogenesis                                       | 7.72E-10 |
| homeostatic process                                      | 7.76E-10 |
| positive regulation of cell migration                    | 8.40E-10 |
| cellular response to organic substance                   | 1.02E-09 |
| regulation of biological process                         | 1.18E-09 |
| response to acid chemical                                | 1.28E-09 |
| negative regulation of programmed cell death             | 1.98E-09 |
| positive regulation of cell motility                     | 2.46E-09 |
| multicellular organismal-level homeostasis               | 2.67E-09 |
| multicellular organismal process                         | 2.78E-09 |
| negative regulation of developmental process             | 2.82E-09 |
| response to cytokine                                     | 2.96E-09 |
| connective tissue development                            | 3.00E-09 |
| positive regulation of locomotion                        | 4.52E-09 |
| regulation of metabolic process                          | 5.94E-09 |
| ossification                                             | 6.55E-09 |
| negative regulation of apoptotic process                 | 7.14E-09 |
| cell population proliferation                            | 9.51E-09 |
| cell surface receptor signaling pathway                  | 1.11E-08 |
| heart development                                        | 1.20E-08 |
| positive regulation of metabolic process                 | 1.26E-08 |
| response to oxygen-containing compound                   | 1.43E-08 |
| anatomical structure formation involved in morphogenesis | 1.77E-08 |
| epithelium development                                   | 1.98E-08 |
| response to endogenous stimulus                          | 2.34E-08 |
| cell migration                                           | 2.60E-08 |
| sensory perception of chemical stimulus                  | 2.63E-08 |
| positive regulation of programmed cell death             | 2.99E-08 |
| regulation of multicellular organismal development       | 3.38E-08 |
| response to organonitrogen compound                      | 3.68E-08 |
| cartilage development                                    | 3.70E-08 |
| cellular response to acid chemical                       | 4.84E-08 |
| nervous system development                               | 5.80E-08 |
| response to lipid                                        | 5.87E-08 |
| regulation of response to external stimulus              | 6.24E-08 |
| regulation of signaling                                  | 6.40E-08 |
| negative regulation of multicellular organismal process  | 6.99E-08 |
| enzyme-linked receptor protein signaling pathway         | 7.67E-08 |
| regulation of signal transduction                        | 8.23E-08 |
| cellular response to cytokine stimulus                   | 8.85E-08 |
| blood vessel morphogenesis                               | 1.03E-07 |
| animal organ morphogenesis                               | 1.22E-07 |
| regulation of primary metabolic process                  | 1.24E-07 |

|                                                            |          |
|------------------------------------------------------------|----------|
| sensory perception of smell                                | 1.29E-07 |
| positive regulation of apoptotic process                   | 1.36E-07 |
| positive regulation of nitrogen compound metabolic process | 1.54E-07 |
| muscle tissue development                                  | 1.58E-07 |
| cellular process                                           | 1.76E-07 |
| regulation of cellular component organization              | 1.82E-07 |
| positive regulation of cell adhesion                       | 2.16E-07 |
| regulation of cellular metabolic process                   | 2.27E-07 |
| negative regulation of cell differentiation                | 2.35E-07 |
| positive regulation of cellular metabolic process          | 2.53E-07 |
| bone development                                           | 2.72E-07 |
| response to inorganic substance                            | 2.73E-07 |
| positive regulation of cell differentiation                | 2.74E-07 |
| regulation of cell communication                           | 3.16E-07 |
| regulation of epithelial cell proliferation                | 3.25E-07 |
| cellular component organization                            | 3.66E-07 |
| response to nitrogen compound                              | 4.08E-07 |
| cell motility                                              | 4.11E-07 |
| response to amino acid                                     | 4.81E-07 |
| cellular response to stimulus                              | 5.37E-07 |
| skeletal system morphogenesis                              | 5.73E-07 |
| regulation of cell-substrate adhesion                      | 5.86E-07 |
| negative regulation of immune system process               | 5.93E-07 |
| positive regulation of macromolecule metabolic process     | 7.22E-07 |
| positive regulation of cell population proliferation       | 8.29E-07 |
| positive regulation of cellular component organization     | 8.35E-07 |
| chondrocyte differentiation                                | 8.85E-07 |
| embryo development                                         | 8.91E-07 |
| regulation of cell development                             | 9.34E-07 |
| positive regulation of multicellular organismal process    | 1.00E-06 |
| cell-substrate adhesion                                    | 1.04E-06 |
| renal system development                                   | 1.22E-06 |
| positive regulation of biosynthetic process                | 1.35E-06 |
| positive regulation of cell-substrate adhesion             | 1.38E-06 |
| regulation of macromolecule metabolic process              | 1.48E-06 |
| apoptotic process                                          | 1.51E-06 |
| regulation of substrate adhesion-dependent cell spreading  | 1.63E-06 |
| positive regulation of developmental process               | 1.63E-06 |
| regulation of cell activation                              | 1.74E-06 |
| regulation of immune system process                        | 2.05E-06 |
| regulation of fat cell differentiation                     | 2.12E-06 |
| positive regulation of cellular biosynthetic process       | 2.14E-06 |
| regulation of phosphate metabolic process                  | 2.18E-06 |
| regulation of phosphorus metabolic process                 | 2.20E-06 |
| regulation of nitrogen compound metabolic process          | 2.25E-06 |
| negative regulation of cell adhesion                       | 2.31E-06 |

|                                                                  |          |
|------------------------------------------------------------------|----------|
| kidney development                                               | 2.31E-06 |
| regulation of myotube differentiation                            | 2.33E-06 |
| regulation of biosynthetic process                               | 2.56E-06 |
| positive regulation of signal transduction                       | 2.61E-06 |
| regulation of smooth muscle cell migration                       | 2.66E-06 |
| negative regulation of cell population proliferation             | 2.85E-06 |
| cellular component organization or biogenesis                    | 3.34E-06 |
| biomineral tissue development                                    | 3.42E-06 |
| skeletal muscle cell differentiation                             | 3.71E-06 |
| positive regulation of smooth muscle cell migration              | 3.71E-06 |
| positive regulation of signaling                                 | 3.82E-06 |
| response to stress                                               | 3.85E-06 |
| response to stimulus                                             | 3.96E-06 |
| regulation of gene expression                                    | 4.34E-06 |
| epithelial cell proliferation                                    | 4.94E-06 |
| response to hormone                                              | 5.07E-06 |
| cellular response to amino acid stimulus                         | 5.14E-06 |
| regulation of cellular biosynthetic process                      | 5.28E-06 |
| transmembrane receptor protein tyrosine kinase signaling pathway | 5.65E-06 |
| programmed cell death                                            | 5.77E-06 |
| cell death                                                       | 5.91E-06 |
| sensory perception                                               | 6.22E-06 |
| positive regulation of cell communication                        | 6.23E-06 |
| regulation of phosphorylation                                    | 6.56E-06 |
| positive regulation of response to stimulus                      | 6.59E-06 |
| negative regulation of response to stimulus                      | 8.72E-06 |
| regulation of small molecule metabolic process                   | 8.79E-06 |
| positive regulation of DNA-templated transcription               | 9.51E-06 |
| regulation of intracellular signal transduction                  | 9.84E-06 |
| positive regulation of RNA biosynthetic process                  | 1.00E-05 |
| endothelium development                                          | 1.01E-05 |
| bone trabecula morphogenesis                                     | 1.03E-05 |
| positive regulation of transcription by RNA polymerase II        | 1.16E-05 |
| collagen metabolic process                                       | 1.22E-05 |
| negative regulation of locomotion                                | 1.27E-05 |
| regulation of catalytic activity                                 | 1.27E-05 |
| tendon development                                               | 1.30E-05 |
| regulation of cold-induced thermogenesis                         | 1.34E-05 |
| tissue morphogenesis                                             | 1.36E-05 |
| muscle structure development                                     | 1.40E-05 |
| positive regulation of epithelial cell proliferation             | 1.49E-05 |
| response to molecule of bacterial origin                         | 1.51E-05 |
| regulation of extracellular matrix organization                  | 1.69E-05 |
| regulation of molecular function                                 | 1.76E-05 |
| bone mineralization                                              | 1.88E-05 |
| endothelial cell differentiation                                 | 1.97E-05 |

|                                                           |          |
|-----------------------------------------------------------|----------|
| chondrocyte development                                   | 2.20E-05 |
| cellular response to lipid                                | 2.26E-05 |
| homeostasis of number of cells                            | 2.37E-05 |
| response to lipopolysaccharide                            | 2.42E-05 |
| intracellular signal transduction                         | 2.42E-05 |
| angiogenesis                                              | 2.55E-05 |
| positive regulation of protein metabolic process          | 2.75E-05 |
| endochondral bone morphogenesis                           | 3.10E-05 |
| regeneration                                              | 3.17E-05 |
| response to abiotic stimulus                              | 3.28E-05 |
| response to wounding                                      | 3.41E-05 |
| positive regulation of cell projection organization       | 3.42E-05 |
| regulation of biological quality                          | 3.56E-05 |
| positive regulation of smooth muscle cell proliferation   | 3.64E-05 |
| locomotion                                                | 3.77E-05 |
| regulation of neuron projection development               | 4.06E-05 |
| wound healing                                             | 4.15E-05 |
| regulation of body fluid levels                           | 4.27E-05 |
| negative regulation of cell motility                      | 4.43E-05 |
| cellular response to endogenous stimulus                  | 4.44E-05 |
| endothelial cell development                              | 4.48E-05 |
| regulation of anatomical structure size                   | 4.88E-05 |
| trabecula morphogenesis                                   | 5.00E-05 |
| chemotaxis                                                | 5.12E-05 |
| positive regulation of RNA metabolic process              | 5.21E-05 |
| taxis                                                     | 5.41E-05 |
| response to extracellular stimulus                        | 5.69E-05 |
| negative regulation of leukocyte activation               | 5.86E-05 |
| artery morphogenesis                                      | 5.88E-05 |
| bone trabecula formation                                  | 5.89E-05 |
| positive regulation of cell development                   | 5.98E-05 |
| negative regulation of metabolic process                  | 6.02E-05 |
| cellular response to oxidative stress                     | 6.43E-05 |
| regulation of inflammatory response                       | 6.75E-05 |
| positive regulation of macromolecule biosynthetic process | 7.09E-05 |
| regulation of anatomical structure morphogenesis          | 7.17E-05 |
| muscle organ development                                  | 7.41E-05 |
| regulation of leukocyte activation                        | 7.46E-05 |
| tissue remodeling                                         | 7.47E-05 |
| positive regulation of catalytic activity                 | 8.24E-05 |
| regulation of DNA-templated transcription                 | 9.03E-05 |
| negative regulation of cell migration                     | 9.20E-05 |
| neutrophil homeostasis                                    | 9.21E-05 |
| response to oxidative stress                              | 9.23E-05 |
| neurogenesis                                              | 9.34E-05 |
| regulation of RNA metabolic process                       | 9.42E-05 |
